# Supplementary material for: γ-Protocadherins regulate neuronal survival but are dispensable for circuit formation in retina
Source: Oxford University Press journal article supplement (doi:10.1242/dev.027912), 2008-11-21

*Chx10-Cre; Z/EG*

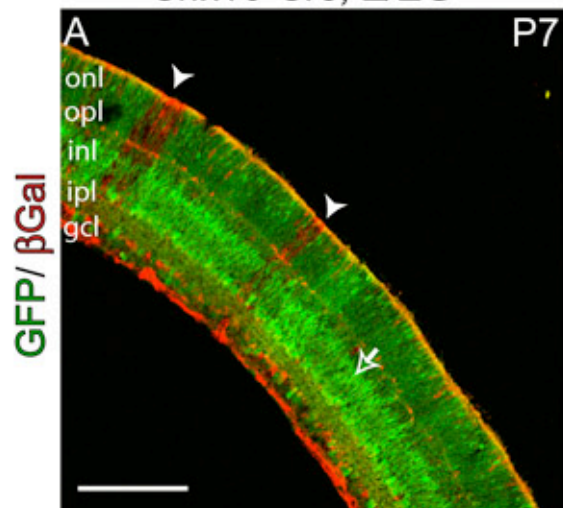

*Chx10-Cre; Z/EG*

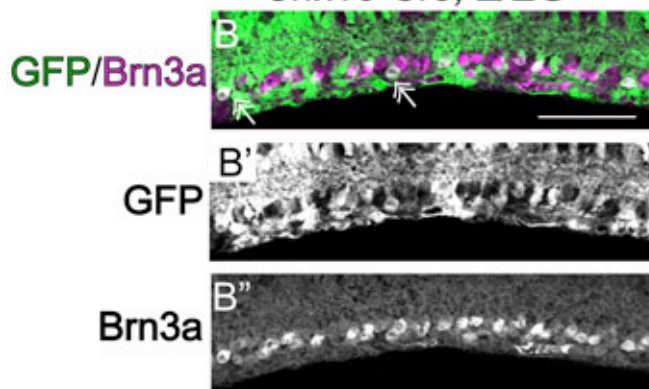

*Pcdh- $\gamma$ <sup>fcon3/fcon3</sup>*

*Chx10-Cre;*  
*Pcdh- $\gamma$ <sup>fcon3/fcon3</sup>*

*Chx10-Cre;*  
*Pcdh- $\gamma$ <sup>fdel/fdel</sup>*

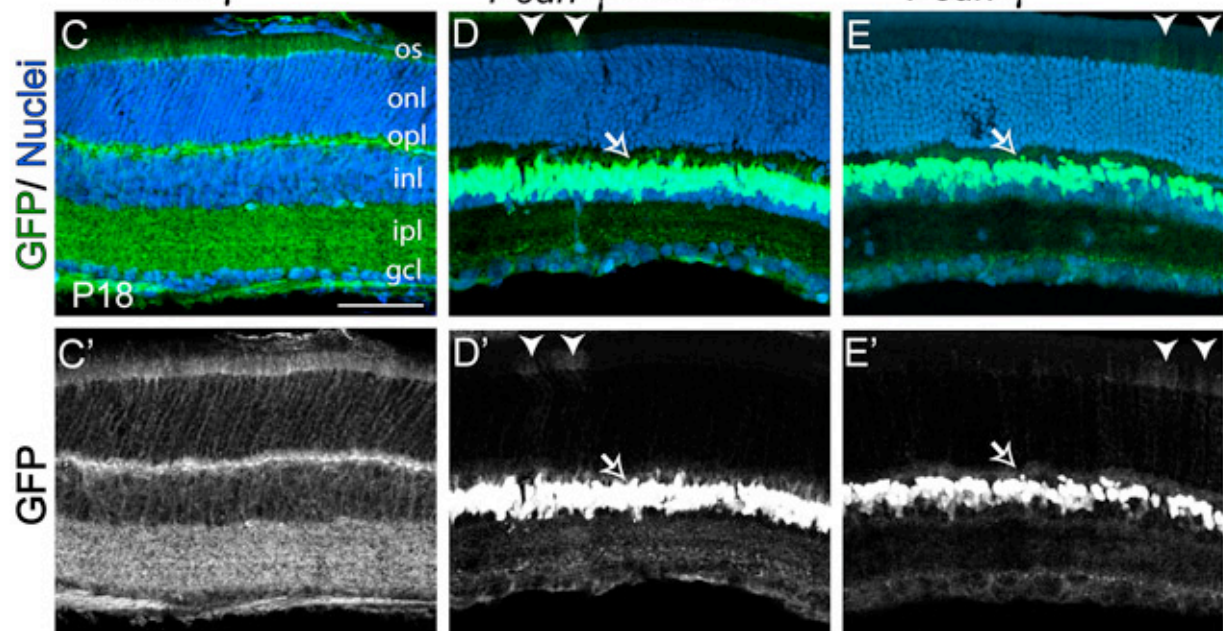

Supplement: dev027912-sup-027912-figs1.pdf [file dev027912-sup-027912-figs1.pdf]
