# Supplementary figures and images for: γ-Protocadherins regulate neuronal survival but are dispensable for circuit formation in retina
Source: Oxford University Press journal article supplement (doi:10.1242/dev.027912), 2008-11-21

# OPL

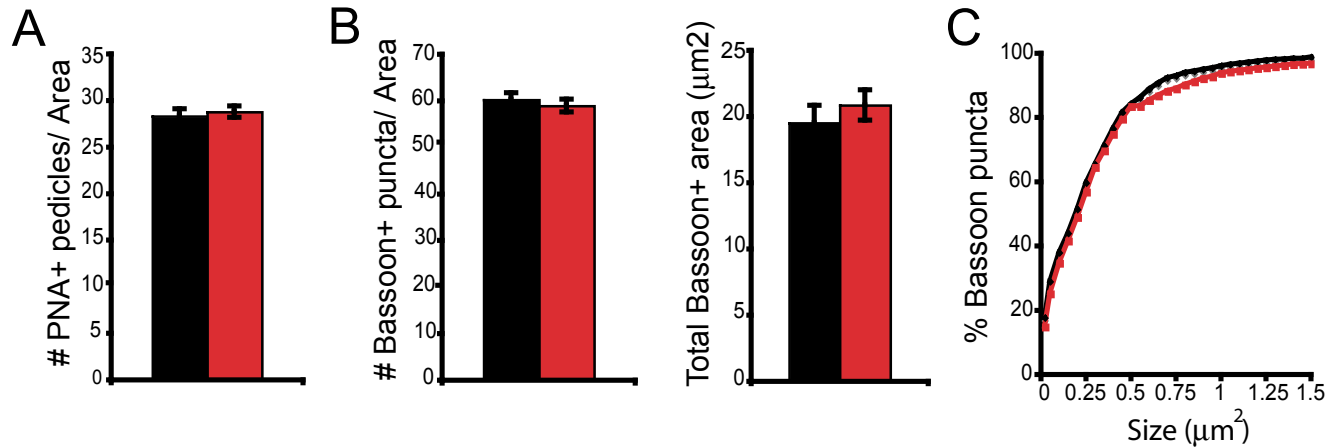

# IPL

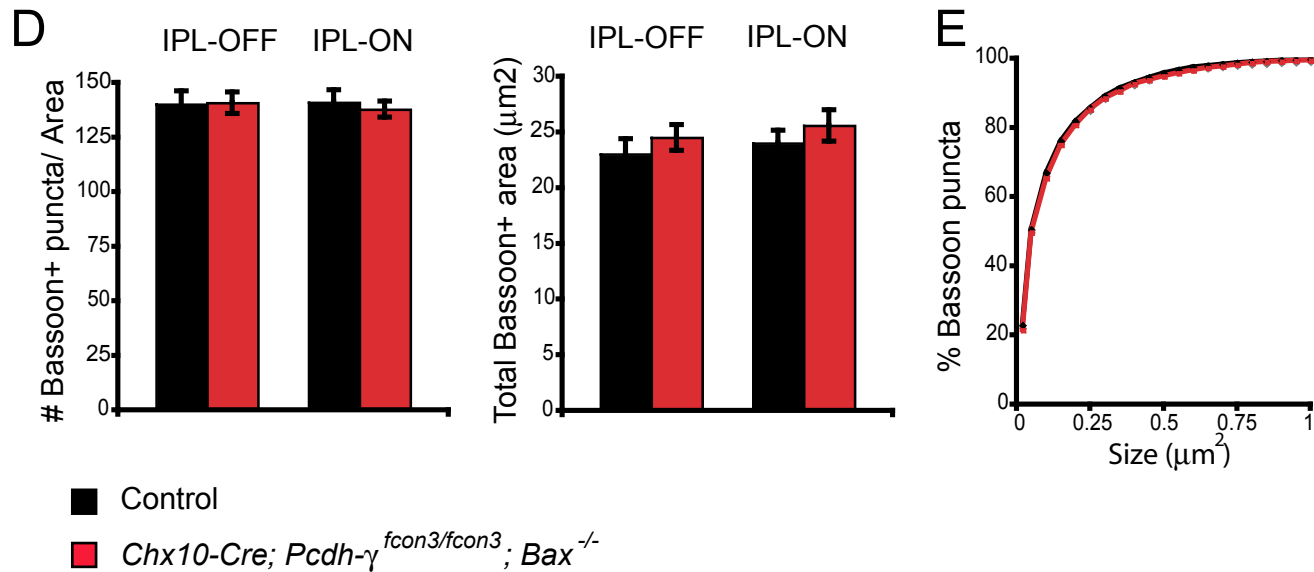

Supplement: dev027912-sup-027912-figs2.pdf [file dev027912-sup-027912-figs2.pdf]

Mutant

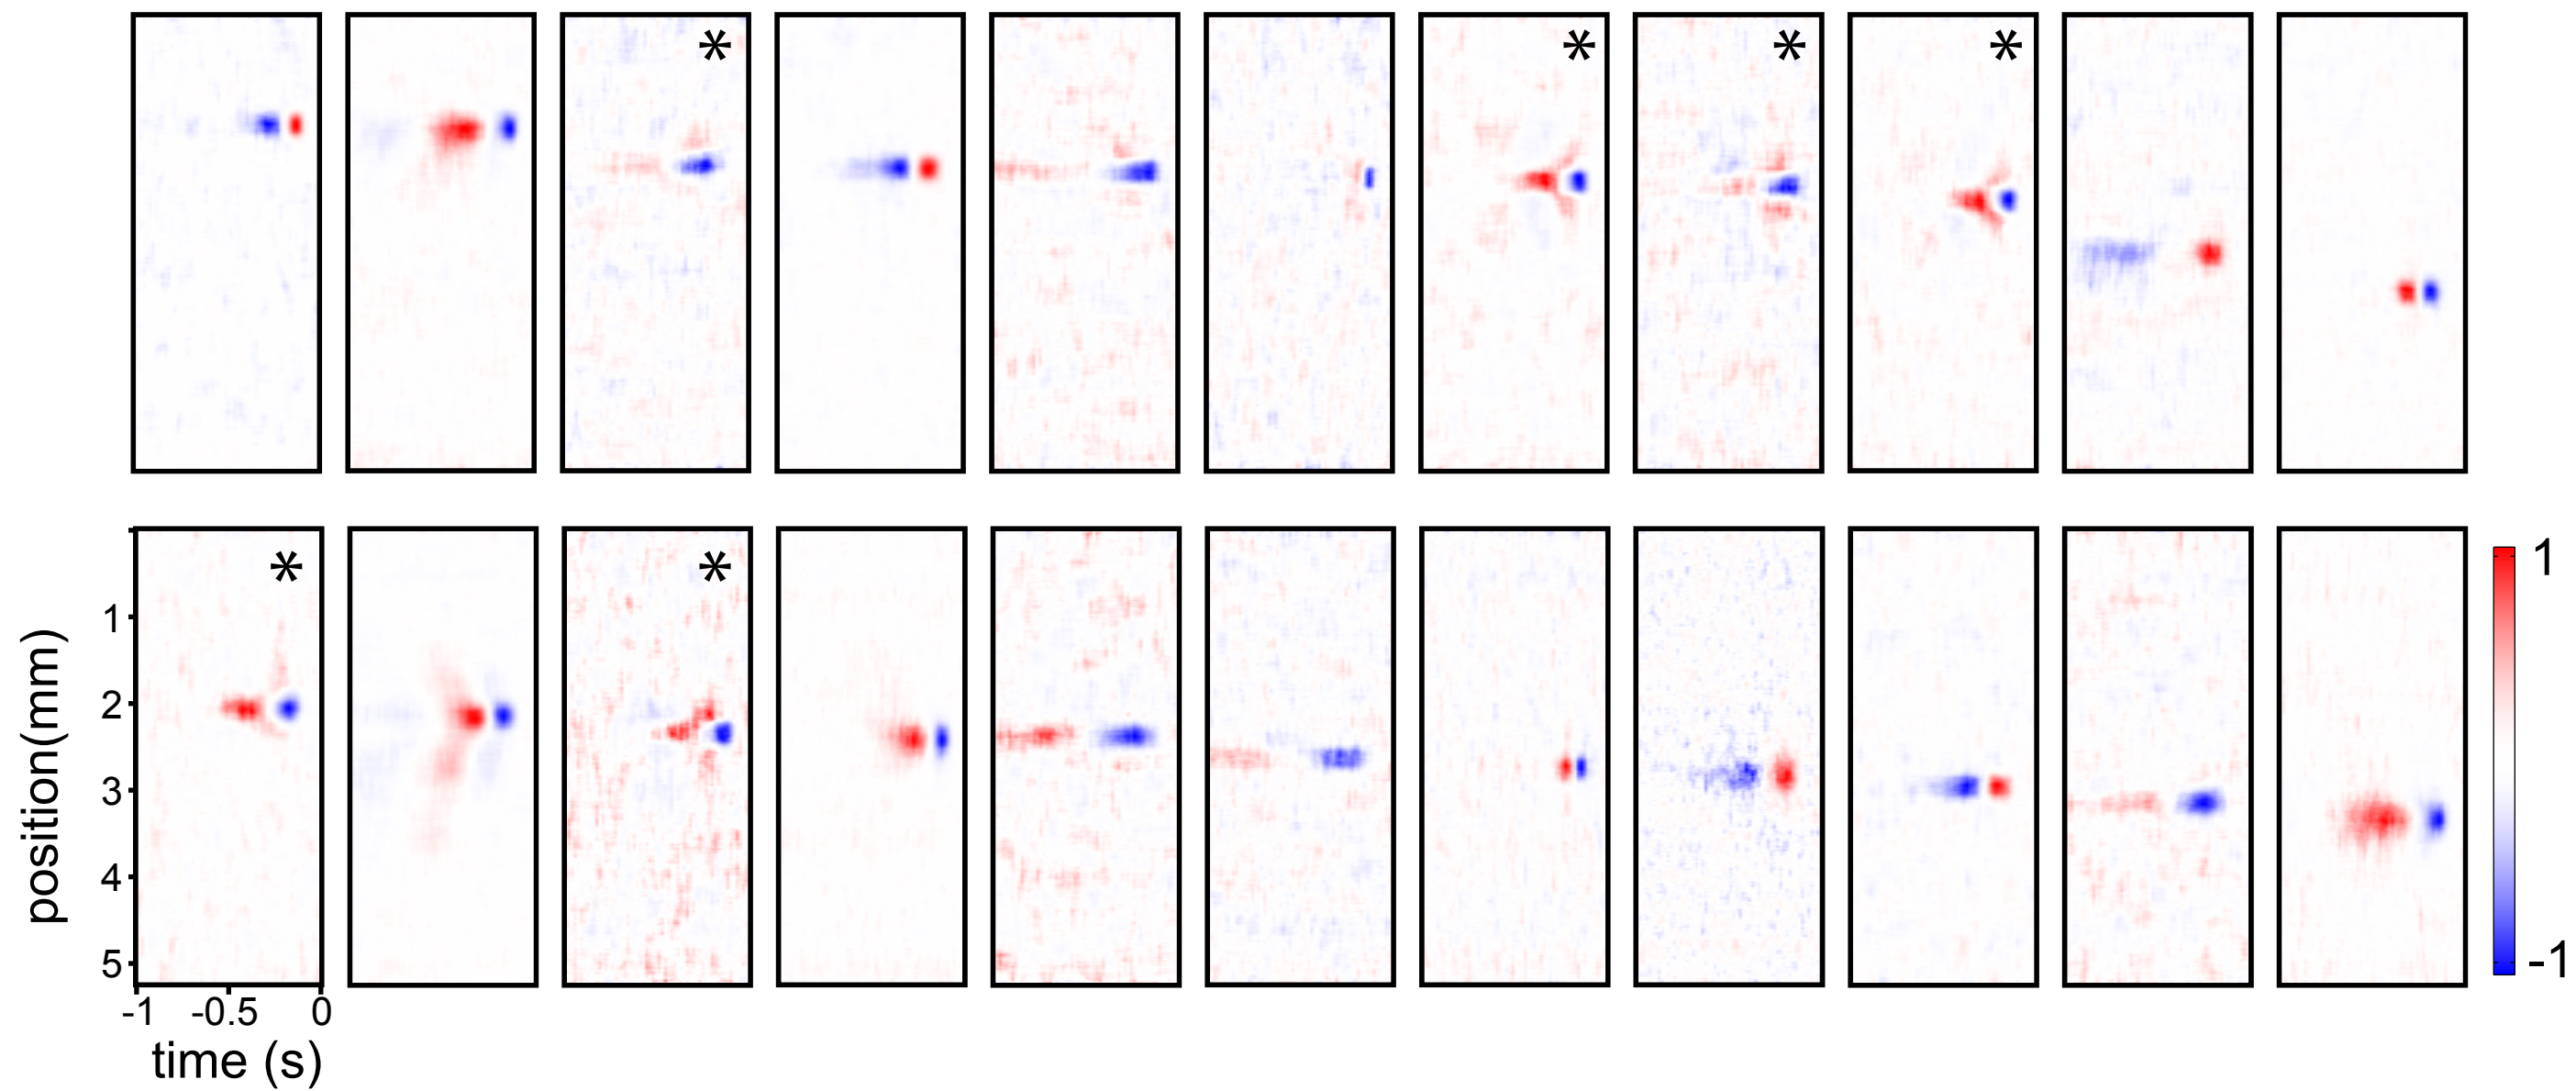

Control

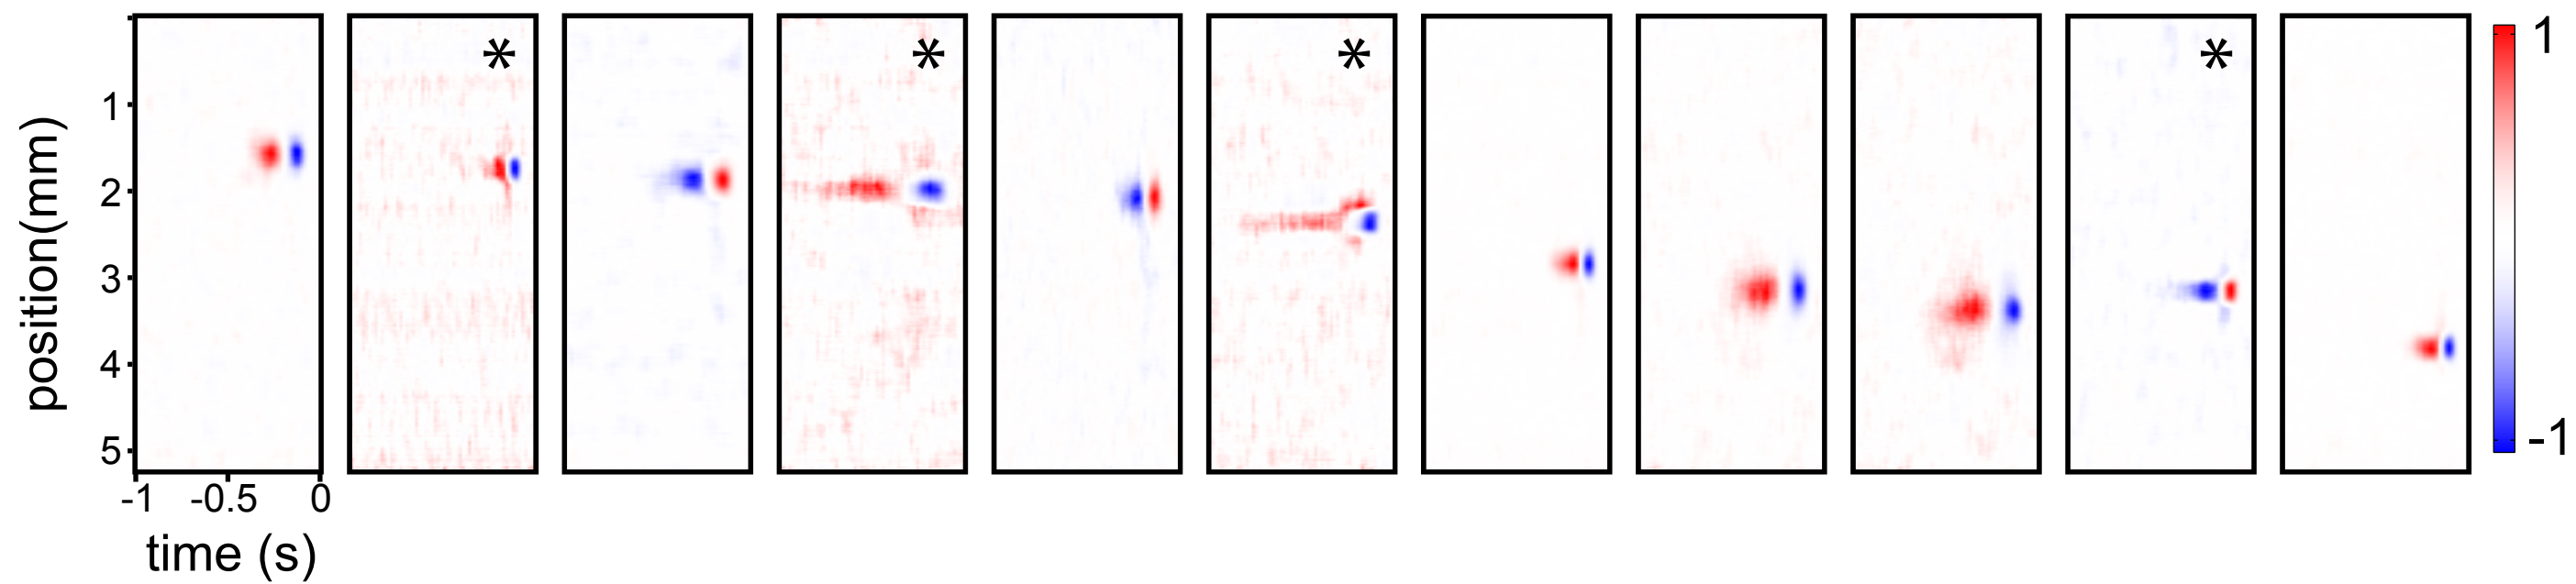

Supplement: dev027912-sup-027912-figs3.pdf [file dev027912-sup-027912-figs3.pdf]
